# Supplementary material
Source: PubMed Central journal article supplement (PMC4342349)

## *Supplementary Data*

### **Synthesis and Biological Evaluation of the [D-MeAla<sup>11</sup>]-Epimer of Coibamide A**

Ryota Nabika,<sup>a</sup> Takashi L. Suyama,<sup>b</sup> Andrew M. Hau,<sup>b</sup> Ryosuke Misu,<sup>a</sup> Hiroaki Ohno,<sup>a</sup>  
Jane E. Ishmael,<sup>b</sup> Kerry L. McPhail,<sup>b</sup> Shinya Oishi,<sup>a,\*</sup> and Nobutaka Fujii<sup>a,\*</sup>

<sup>a</sup> Graduate School of Pharmaceutical Sciences, Kyoto University, Sakyo-ku, Kyoto 606-8501, Japan

<sup>b</sup> Department of Pharmaceutical Sciences, College of Pharmacy, Oregon State University, Corvallis, Oregon 97331, USA.

*soishi@pharm.kyoto-u.ac.jp (S.O.), nfujii@pharm.kyoto-u.ac.jp (N.F.)*

#### **Table of contents**

|                                                                                                                                                                                   |     |
|-----------------------------------------------------------------------------------------------------------------------------------------------------------------------------------|-----|
| Experimental procedures                                                                                                                                                           | S2  |
| Retention times for Marfey's derivatives of amino acid standards and the corresponding amino acid in the hydrolysate of synthetic [D-MeAla <sup>11</sup> ]-coibamide A (Table S1) | S9  |
| Comparative <sup>1</sup> H NMR spectra for [D-MeAla <sup>11</sup> ]-coibamide A and natural coibamide A                                                                           | S10 |
| <sup>1</sup> H and <sup>13</sup> C NMR spectra of newly characterized compounds                                                                                                   | S11 |

## Experimental procedures

**Synthetic general methods.** Optical rotations were measured with a JASCO P-1020 polarimeter.  $^1\text{H}$  and  $^{13}\text{C}$  NMR spectra were recorded using a JEOL ECA-500 spectrometer, and chemical shifts are reported in  $\delta$  (ppm) relative to a TMS internal standard (at  $\delta_{\text{H}}$  0 in  $\text{CDCl}_3$ ), and the residual  $\text{CHCl}_3$  signal ( $\delta_{\text{C}}$  77.23 ppm), respectively.  $^1\text{H}$  NMR spectra are tabulated as follows: chemical shift, multiplicity (br = broad, s = singlet, d = doublet, t = triplet, q = quartet, m = multiplet), number of protons, and coupling constant(s). Electrospray ionization mass spectrometry (ESI-MS) data were recorded using a Quattro micro API (Waters) spectrometer. High resolution mass spectra were recorded on a Shimadzu LC-ESI-IT-TOF-MS. Infrared (IR) spectra were obtained on a JASCO FT/IR-4100 FT-IR spectrometer with JASCO ATR PRO410-S. For flash chromatography, Wakogel C-300E was employed. For analytical reversed phase HPLC, a Cosmosil 5C<sub>18</sub>-ARII column (4.6 × 250 mm, Nacalai Tesque Inc., Kyoto, Japan) was employed with a linear gradient of  $\text{CH}_3\text{CN}$  containing 0.1% (v/v) TFA (solvent B) in 0.1% TFA/ $\text{H}_2\text{O}$  (solvent A) at a flow rate of 1 mL/min on a Hitachi L-2130 system (Hitachi corporation, Ltd, Tokyo, Japan). Preparative HPLC was performed using a Cosmosil 5C<sub>18</sub>-ARII column (20 × 250 mm, Nacalai Tesque Inc.) with a linear gradient of solvent B in solvent A at a flow rate of 8 mL/min on a Hitachi L-7150 system (Hitachi corporation, Ltd).

**Fmoc-MeSer(Me)-OH.** Fmoc-MeSer(Me)-OH was synthesized by the identical procedure reported previously.<sup>S1</sup> To a suspension of Fmoc-Ser(Me)-OH (5.0 g, 14.7 mmol) in toluene (293 mL), paraformaldehyde (2.93 g, 97.6 mmol) and *p*-toluenesulfonic acid monohydrate (293 mg, 1.54 mmol) were added, and the mixture was refluxed for 1 h. The solution was cooled, washed with 1 N  $\text{NaHCO}_3$  aq. and dried over  $\text{Na}_2\text{SO}_4$ . Concentration in vacuo gave a crystalline product. The crystalline product was dissolved in  $\text{CHCl}_3/\text{TFA}$  (1:1, 147 mL), and triethylsilane (7.02 mL, 44.0 mmol) were added. The solution was stirred at room temperature for 23 h followed by concentration to give an oily residue. Purification by flash chromatography on silica gel ( $\text{CHCl}_3:\text{MeOH} = 95:5$  to  $90:10$ ) provided Fmoc-MeSer(Me)-OH as a colorless oil (4.98 g, 2 steps 96%):  $[\alpha]_{\text{D}}^{26} -2.11$  (*c* 1.17,  $\text{CHCl}_3$ ); IR (neat): 2918, 1739, 1699, 1451, 1404, 1323, 1160, 911, 740  $\text{cm}^{-1}$ ;  $^1\text{H}$  NMR (500 MHz,  $\text{CDCl}_3$ )  $\delta$  2.95 and 3.03 (2 s, 3H), 3.26 and 3.39 (2 s, 3H), 3.50-3.66 (m, 1H), 3.73-3.94 (m, 1H), 4.19-4.33 (m, 1H), 4.35-4.65 (m, 2H), 4.96 (dd,  $J = 7.8, 4.4$  Hz, 1H), 7.24-7.47 (m, 4H), 7.52-7.68 (m, 2H), 7.70-7.83 (m, 2H);  $^{13}\text{C}$  NMR (125 MHz,  $\text{CDCl}_3$ )  $\delta$  32.3, 47.1, 58.9, 59.0, 67.5, 68.0, 69.9, 70.1, 120.0, 124.7, 125.0, 127.1, 127.7, 141.3, 143.8, 156.0, 157.0, 174.0; HRMS (ESI)  $m/z$  calcd for  $\text{C}_{20}\text{H}_{22}\text{NO}_5$  ( $[\text{M}+\text{H}]^+$ ) 356.1498, found: 356.1493.

**H-Hva-OBn (6).** To a suspension of (*S*)-2-hydroxyisovaleric acid (500 mg, 4.23 mmol), NaHCO<sub>3</sub> (711 mg, 21.2 mmol) in dry DMF (12.8 mL) was added BnBr (2.51 mL, 4.23 mmol) dropwise, and the mixture was stirred under Ar at room temperature for 23 h. The resulting mixture was diluted with EtOAc and the extract was washed with water, saturated NH<sub>4</sub>Cl and brine, and dried over Na<sub>2</sub>SO<sub>4</sub>. After concentration, the residue was purified by flash chromatography on silica gel (*n*-hexane:EtOAc = 9:1) to provide the ester **6** as a colorless oil (708 mg, 80%):  $[\alpha]_D^{27} -10.1$  (*c* 2.00, CHCl<sub>3</sub>); IR (neat): 3500, 2964, 2933, 2875, 1732, 1456, 1370, 1262, 1213, 1137, 1071, 1029, 908, 733, 697 cm<sup>-1</sup>; <sup>1</sup>H NMR (400 MHz, CDCl<sub>3</sub>)  $\delta$  0.83 (d, *J* = 6.9 Hz, 3H), 1.01 (d, *J* = 6.9 Hz, 3H), 2.09 (m, 1H), 2.76 (s, 1H), 4.08 (d, *J* = 3.2 Hz, 1H), 5.19 (d, *J* = 11.9 Hz, 1H), 5.24 (d, *J* = 11.9 Hz, 1H), 7.31-7.41 (m, 5H); <sup>13</sup>C NMR (100 MHz, CDCl<sub>3</sub>)  $\delta$  15.8, 18.8, 32.1, 67.2, 75.0, 128.4, 128.5, 128.6, 135.1, 174.8; HRMS (ESI) *m/z* calcd for C<sub>12</sub>H<sub>16</sub>NaO<sub>3</sub> ([M+Na]<sup>+</sup>) 231.0997, found: 231.1000.

**Fmoc-Val-Hva-OBn (7).** H-Hva-OBn **6** (300 mg, 1.44 mmol) and DMAP (17.6 mg, 0.144 mmol) were added to a stirred mixture of Fmoc-Val-OH (586 mg, 1.73 mmol) and DCC (594 mg, 2.88 mmol) in dry THF (3 mL). The mixture was stirred at room temperature for 24 h. The resulting mixture was poured into Et<sub>2</sub>O, and the solution was filtered through a Celite pad. The filtrate was washed with saturated NaHCO<sub>3</sub>, water and brine, and dried over Na<sub>2</sub>SO<sub>4</sub>. After concentration, the residue was purified by flash column chromatography on silica gel (*n*-hexane:DCM:EtOAc = 60:35:5) to provide the ester **7** as a colorless oil (463 mg, 61%):  $[\alpha]_D^{25} -29.1$  (*c* 1.00, CHCl<sub>3</sub>); IR (neat): 2963, 1744, 1513, 1451, 1371, 1280, 1174, 1094, 1033, 911, 683 cm<sup>-1</sup>; <sup>1</sup>H NMR (400 MHz, CDCl<sub>3</sub>)  $\delta$  0.84-1.24 (m, 12H), 2.27 (m, 2H), 4.23 (t, *J* = 6.9 Hz, 1H), 4.35-4.56 (m, 3H), 4.94 (d, *J* = 4.0 Hz, 1H), 5.16 (d, *J* = 12.0 Hz, 1H), 5.20 (d, *J* = 12.0 Hz, 1H), 5.32 (d, *J* = 8.6 Hz, 1H), 7.28-7.50 (m, 9H), 7.60 (d, *J* = 6.9 Hz, 2H), 7.76 (d, *J* = 7.4 Hz, 2H); <sup>13</sup>C NMR (125 MHz, CDCl<sub>3</sub>)  $\delta$  17.0, 17.1, 18.7, 18.9, 30.1, 31.3, 47.2, 58.6, 67.0, 67.1, 77.4, 120.0, 125.1, 127.0, 127.7, 128.4, 128.5, 128.6, 135.1, 141.3, 143.7, 143.9, 156.2, 169.1, 171.9; HRMS (ESI) *m/z* calcd for C<sub>32</sub>H<sub>35</sub>NNaO<sub>6</sub> ([M+Na]<sup>+</sup>) 552.2362, found: 552.2369.

**Fmoc-Val-Hva-OH (8).** To a solution of Fmoc-Val-Hva-OBn **7** (430 mg, 0.82 mmol) in DCM (2.73 mL) was added 10% Pd/C (59.3 mg), and the mixture was stirred under H<sub>2</sub> at room temperature for 7 h. The resulting mixture was filtered through a Celite pad, and the filtrate was concentrated. Purification of the residue by flash column chromatography on silica gel (EtOAc:EtOH = 1:0 to 0:1) provided the acid **8** as a colorless oil (246 mg, 68%):  $[\alpha]_D^{26} -28.3$  (*c* 1.00, CHCl<sub>3</sub>); IR (neat): 3459, 2964, 1723, 1617, 1513, 1450, 1407, 1277, 1109, 1014, 907, 683, 649 cm<sup>-1</sup>; <sup>1</sup>H NMR (400 MHz,

CDCl<sub>3</sub>)  $\delta$  0.86-1.08 (m, 12H), 2.28 (m, 2H), 4.23 (m, 1H), 4.35-4.49 (m, 3H), 4.93 (m, 1H), 5.35 (m, 1H), 6.54 (s, 1H), 7.24-7.32 (m, 2H), 7.35-7.40 (m, 2H), 7.60 (m, 2H), 7.74 (d,  $J = 7.5$  Hz, 2H); <sup>13</sup>C NMR (100 MHz, CDCl<sub>3</sub>)  $\delta$  17.0, 17.1, 18.8, 18.9, 30.0, 31.2, 47.1, 58.7, 67.2, 77.1, 120.0, 125.1, 127.0, 127.7, 141.3, 143.7, 143.8, 156.4, 172.0, 173.9; HRMS (ESI)  $m/z$  calcd for C<sub>25</sub>H<sub>30</sub>NO<sub>6</sub> ([M+H]<sup>+</sup>) 440.2073, found: 440.2079.

**Fmoc-MeAla-(2-Cl)Trt resin (1).** A solution of Fmoc-MeAla-OH (650.7 mg, 2.0 mmol) and (*i*-Pr)<sub>2</sub>NEt (2.32 mL, 13.3 mmol) in DCM (22.2 mL) was added to (2-Cl)Trt chloride resin (2.22 g, 3.33 mmol), and the reaction was continued for 2 h at room temperature. The reagent solution was filtered off, and the resin was washed with DCM/DMF/(*i*-Pr)<sub>2</sub>NEt (17:2:1) to yield the desired resin **1** (0.616 mmol/g, 2.81 g, 86% loading).

**Fmoc deprotection during solid-phase peptide synthesis.** The peptidyl resin was treated with piperidine/DMF (2:8) for 20 min. For the Fmoc deprotection for Tyr(Me)<sup>10</sup> and MeLeu<sup>9</sup>, Fmoc-protected resin was treated with piperidine/DMF (2:8) for 2 min followed by additional 8 min.

**Coupling reaction using HATU/(*i*-Pr)<sub>2</sub>NEt [for Ala<sup>8</sup> and Tyr(Me)<sup>10</sup>].** To a solution of Fmoc amino acids (4.33 mmol) in DMF (8 mL) were added HATU (1.61 g, 4.24 mmol) and (*i*-Pr)<sub>2</sub>NEt (1.51 mL, 8.65 mmol). After 2 min, the whole was poured to the peptidyl resin (0.865 mmol), and the reaction was continued for 2 h.

**Coupling reaction using DIC/HOBt [for MeIle<sup>7</sup> and MeLeu<sup>9</sup>].** To a solution of Fmoc amino acid (4.33 mmol) in DMF (8 mL) were added DIC (670  $\mu$ L, 4.33 mmol) and HOBt·H<sub>2</sub>O (663 mg, 4.33 mmol). After 2 min, the whole was poured to the peptidyl resin (0.865 mmol), and the reaction was continued for 2 h.

**Coupling reaction using DIC/HOAt [for Val<sup>1</sup>-Hva<sup>2</sup>, Thr(Trt)<sup>5</sup> and Ser(Me)<sup>6</sup>].** To a solution of Fmoc amino acid (4.33 mmol) in DMF (8 mL) were added DIC (670  $\mu$ L, 4.33 mmol) and HOAt (589 mg, 4.33 mmol). After 2 min, the whole was poured to the peptidyl resin (0.865 mmol), and the reaction was continued for 16 h.

**Coupling reaction using BTC [for MeSer(Me)<sup>3</sup> and MeLeu<sup>4</sup>].** To a solution of BTC (295 mg, 0.995 mmol) in dry THF (14.6 mL) were added Fmoc-amino acids (3.03 mmol), 2,4,6-collidine

(1.14 mL, 8.65 mmol) and (*i*-Pr)<sub>2</sub>NEt (1.21 mL, 6.92 mmol). This solution was added to the peptidyl resin in dry THF (6.27 mL), and the reaction was continued for 2.5 h (MeSer(Me)<sup>3</sup>) or for 4 h (MeLeu<sup>4</sup>).

**N-Methylation on solid support by Ns-strategy.** 2,4,6-collidine (1.14 mL, 8.65 mmol) and NsCl (767 mg, 3.46 mmol) were added to the peptidyl resin (0.865 mmol) in NMP (5 mL), and the reaction was continued for 15 min at room temperature.

After removal of the reagent solution, PPh<sub>3</sub> (1.13 g, 4.33 mmol) and MeOH (350  $\mu$ L, 8.65 mmol) in dry THF (3 mL) was added to a suspension of the resin, followed by dropwise addition of DIAD (2.27 mL, 4.33 mmol) in dry THF (3 mL), and the reaction was continued for 30 min at room temperature. This Mitsunobu reaction was repeated twice.

To the methylated peptidyl resin in NMP (6 mL), DBU (648  $\mu$ L, 4.33 mmol) and 2-mercaptoethanol (607  $\mu$ L, 8.65 mmol) were added, and the reaction was continued for 5 min. This process was repeated twice.

**Reductive amination for N-terminal methylation and cleavage from the resin: linear peptide (4).** NaBH(OAc)<sub>3</sub> (1.83 g, 8.65 mmol) in DCE (3 mL) and formalin (644  $\mu$ L, 8.65 mmol) in DCE (3 mL) were added to the peptidyl resin (0.865 mmol), and the reaction was continued for 2 h at room temperature. The resulting peptidyl resin was washed with DCE and MeOH, and the filtrate was concentrated. The residue was dissolved in DCM, and the solution was washed with water, and dried over Na<sub>2</sub>SO<sub>4</sub>. The resulting oil was treated with TFA/DCM (5:95, 5 mL) for 30 min, and the mixture was concentrated. Separately, the peptidyl resin was also treated with TFA/DCM (5:95, 5 mL) for 30 min, and the mixture was concentrated. The combined crude linear peptide was treated with Et<sub>3</sub>N/DCM (8:1, 9 mL) for 1 day. After concentration, the residue was purified by reverse-phase preparative HPLC (32-52% linear gradient of solvent B in solvent A over 60 min) to yield the linear peptide **4** (327 mg, 29% from the resin) as colorless powder: *t*<sub>R</sub>: 21.4 min (35–55% linear gradient of solvent B in solvent A over 40 min); purity: >99%; MS (ESI+) 1327.9 [M+Na]<sup>+</sup>, 1306.0 [M+H]<sup>+</sup>.

**Synthesis of [D-MeAla<sup>11</sup>]-coibamide A.** To a solution of the linear peptide **4** (49.9 mg, 0.038 mmol) in DCM/DMF/NMI (90:8:2, 38.0 mL) were added MSNT (226 mg, 0.764 mmol) and (*i*-Pr)<sub>2</sub>NEt (397  $\mu$ L, 2.28 mmol), and the reaction was stirred at 30 °C for 3 days. After concentration of the reaction mixture, the residue was purified by preparative HPLC [MeOH-H<sub>2</sub>O (9:1)] to provide [D-MeAla<sup>11</sup>]-coibamide A (1.87 mg, 3.8%): *t*<sub>R</sub>: 35.1 min (40–70% linear gradient of solvent B in

solvent A over 60 min);  $[\alpha]_D^{28} -48.1$  ( $c$  0.02,  $\text{CHCl}_3$ ); IR (neat): 3401, 2963, 2251, 1732, 1644, 1466, 1407, 1248, 1095, 729;  $^1\text{H}$  NMR (500 MHz,  $\text{CDCl}_3$ )  $\delta$  0.80–1.10 (m, 37H), 1.26–1.29 (m, 4H), 1.37 (m, 2H), 1.51 (m, 4H), 2.05 (m, 2H), 2.19–2.20 (m, 2H), 2.40 (s, 9H), 2.75 (s, 3H), 2.86 (m, 6H), 3.00–3.03 (m, 4H), 3.13–3.16 (m, 6H), 3.30–3.31 (m, 6H), 3.49–3.53 (m, 2H), 3.64 (m, 2H), 3.72–3.78 (m, 6H), 4.75 (br m, 1H), 5.11 (d,  $J = 6.3$  Hz, 1H), 5.13 (m, 1H), 5.30 (m, 1H), 5.36 (m, 1H), 5.50 (m, 1H), 5.71 (m, 1H), 5.83 (m, 1H), 6.31 (br s, 1H), 6.60 (br s, 1H), 6.70 (br s, 1H), 6.80 (d,  $J = 8.6$  Hz, 2H), 7.11 (d,  $J = 8.6$  Hz, 2H);  $^{13}\text{C}$  NMR (125 MHz,  $\text{CDCl}_3$ )  $\delta$  11.6, 12.9, 15.7, 17.9, 18.6, 18.8, 19.3, 19.6, 21.1, 21.9, 22.8, 23.2, 24.2, 25.0, 25.3, 27.7, 28.9, 29.6, 29.9, 30.0, 31.0, 31.9, 36.4, 38.0, 38.8, 39.5, 41.2, 47.0, 49.9, 51.0, 51.1, 52.1, 52.9, 55.2, 58.76, 58.80, 63.5, 64.7, 68.2, 68.6, 69.1, 74.0, 74.6, 113.8, 128.2, 130.4, 158.6, 167.2, 168.6, 169.7, 169.8, 170.3, 170.4, 171.4, 171.6; MS (ESI+) 1309.9  $[\text{M}+\text{Na}]^+$ , 1287.9  $[\text{M}+\text{H}]^+$ , 644.5  $[\text{M}+2\text{H}]^{2+}$ .

**Determination of the configuration of component amino acids.** A portion of the synthetic product (1.2 mg) was hydrolyzed in 6N HCl (2 mL) at 105 °C for 24 h and evaporated to dryness. A solution of 1% 1-fluoro-2-4-dinitrophenyl-5-L-leucinamide (FDLA) in acetone (300  $\mu\text{L}$ ), and saturated  $\text{NaHCO}_3$  (1 mL), were added to a portion of the hydrolysate (1 mg) and the mixture was heated (40 °C, 1 h). The solution was evaporated to dryness, and the residue resuspended in MeOH for filtration through a  $\text{C}_{18}$  solid phase extraction cartridge (100 mg) before analysis by LC-MS. The amino acid standards were derivatized following the same procedure. LC-MS analyses were performed on a Thermo Aquasil  $\text{C}_{18}$  column ( $2 \times 150$  mm, 5  $\mu\text{m}$ ) using two different MeCN- $\text{H}_2\text{O}$  linear solvent gradients and negative mode ESIMS. For Tyr(Me) and MeLeu analyses (40 min total run time, flow rate 0.6 mL/min): hold 5 min at 10% MeCN- $\text{H}_2\text{O}$ , ramp to 45% MeCN- $\text{H}_2\text{O}$  over 25 min and hold 10 min. For MeSer(Me), Ala and MeAla analyses (60 min total run time, flow rate 0.8 mL/min): hold 10 min at 10% MeCN- $\text{H}_2\text{O}$ , ramp to 35% MeCN- $\text{H}_2\text{O}$  over 40 min and hold 10 min. The retention times (Table S1) of the derivatized residues in the synthetic product hydrolysate matched L-Tyr(Me), L-MeLeu, L-MeSer(Me), L-MeThr, L-Ala, and D-MeAla. The co-eluting L-MeSer(Me) and L-Ala HPLC peaks were distinguished by their MS data. Further analyses were also performed in which the enantiomeric standards (D-MeSer(Me) and L-MeAla) were separately coinjected with the hydrolysate, resulting in the detection of two distinct peaks with identical  $m/z$ , matching the retention times of L- and D- standards in each case, as expected. MS fragmentation patterns were also useful for differentiating between MeSer(Me) and MeThr residues. To assign the Hva residue by GC-MS analysis, L- and D-Hva standards and the remaining portion of the synthetic product acid hydrolysate (0.2 mg) were each treated with *i*-PrOH and acetyl chloride (105 °C, 1 h),

dried under a stream of N<sub>2</sub> gas, and derivatized with pentafluoropropanoic anhydride (PFPA) in CH<sub>2</sub>Cl<sub>2</sub> in a sealed vial (105 °C, 10 min) before drying under N<sub>2</sub> again. The resulting residues were analyzed using a chiral Cyclasil B column (30.0 m × 250 μm, 0.25 μm), leading to the assignment of L-Hva (*t<sub>R</sub>* = 11.1 min; D-Hva, 11.4 min).

**Growth inhibition/viability assay (Table 1).**<sup>S2</sup> A549, HCT-116, MCF-7 (generous gifts from Dr. Akira Hirasawa, Graduate School of Pharmaceutical Sciences, Kyoto University) and B16 melanoma cells (generous gift from Dr. Hiroshi Nose, Kola-Gen Pharma) were cultured in DMEM medium (Sigma), McCoy's 5A medium (GIBCO), EMEM medium (Wako), and DMEM medium (Sigma), respectively, supplemented with 10% (v/v) FBS at 37 °C in a 5% CO<sub>2</sub> incubator. A549, HCT-116, MCF-7 and B16 melanoma cells were seeded at 500, 5000, 5000 and 2000 cells/well in 50 μL of culture media in 96-well plates (BD Falcon), respectively, and incubated for 6 h. Chemicals in DMSO were diluted 250-fold with the culture medium in advance. After addition of fresh culture medium (40 μL), the chemical diluents (30 μL) were added to the cell cultures. The cells under chemical treatment were incubated for a further 72 h. The wells in the plates were washed twice with phenol-red minus medium. After 1 h incubation with 100 μL of the medium, the cells were supplemented with 20 μL of the MTS reagent (Promega), followed by incubation for an additional 40 min. Absorbance at 490 nm of each well was measured using a Wallac 1420 ARVO SX multilabel counter (Perkin Elmer).

**Growth inhibition/viability assay (Table 2).** Human PC-3 prostate cancer, MDA-MB-231 breast cancer and H292 lung cancer cell lines were purchased from the American Type Culture Collection (ATCC; Manassas, VA, USA). Human SF-295 glioblastoma cells were obtained from the NCI cell line repository (Frederick, MD, USA). PC-3 cells were maintained in DMEM (MediaTech Inc., Manassas, VA, USA) supplemented with 10% FBS (HyClone, Logan, UT), L-glutamine (2 mM) and 1% penicillin/streptomycin (Mediatech Inc.). SF-295, MDA-MB-23, and H292 cells were cultured in RPMI-1640 medium supplemented with L-glutamine (2 mM), sodium pyruvate (1 mM), sodium bicarbonate (1.5 g/L), 1% penicillin/streptomycin and 10% FBS. All cells were maintained in a humidified chamber containing 5% CO<sub>2</sub> and were seeded (3,000 cells per well) into 96-well flat-bottom plates (BD Biosciences, Franklin Lakes, NJ) 16 h before the addition of the test compound or vehicle (DMSO). Treated cells were then maintained under standard cell culture conditions for a further 72 h. The viability of all cells was assessed by MTT assay as described previously<sup>S3</sup> with the viability of vehicle-treated cells defined as 100%.

## References

- S1 Freidinger, R. M.; Hinkle, J. S.; Perlow, D. S.; Arison, B. H. *J. Org. Chem.* **1983**, *48*, 77.
- S2 Hou, Z.; Nakanishi, I.; Kinoshita, T.; Takei, Y.; Yasue, M.; Misu, R.; Suzuki, Y.; Nakamura, S.; Kure, T.; Ohno, H.; Murata, K.; Kitaura, K.; Hirasawa, A.; Tsujimoto, G.; Oishi, S.; Fujii, N. *J. Med. Chem.* **2012**, *55*, 2899.
- S3 Hau, A. M.; Greenwood, J. A.; Löhr, C. V.; Serrill, J. D.; Proteau, P. J.; Ganley, I. G.; McPhail, K. L.; Ishmael J. E. *PLoS One* **2013**, *8*, e65250.



**Table S1.** Retention times for Marfey's derivatives of amino acid standards and the corresponding amino acid in the hydrolysate of synthetic [ $D$ -MeAla<sup>11</sup>]-coibamide A

| Amino Acid<br>(AA) | Observed $m/z$<br>(ESI neg.) for<br>FDLA-AA | $t_R$ (min):<br>authentic standard | $t_R$ (min):<br>hydrolysate of<br>synthetic coibamide |
|--------------------|---------------------------------------------|------------------------------------|-------------------------------------------------------|
| L-Ala              | 382                                         | 48.35                              | 48.25                                                 |
| D-Ala              | 382                                         | 54.35                              |                                                       |
| L-MeAla            | 396                                         | 51.27                              |                                                       |
| D-MeAla            | 396                                         | 51.82                              | <u>51.75</u>                                          |
| L-MeLeu            | 438                                         | 35.56                              | 35.68                                                 |
| D-MeLeu            | 438                                         | 39.08                              |                                                       |
| L-MeSer(Me)        | 426                                         | 48.30                              | 48.25                                                 |
| D-MeSer(Me)        | 426                                         | 49.17                              |                                                       |
| L-Tyr(Me)          | 488                                         | 34.08                              | 34.11                                                 |
| D-Tyr(Me)          | 488                                         | 38.81                              |                                                       |
| L-MeThr            | 426                                         | 43.19                              | 43.44                                                 |
| D-MeThr            | 426                                         | 47.12                              |                                                       |

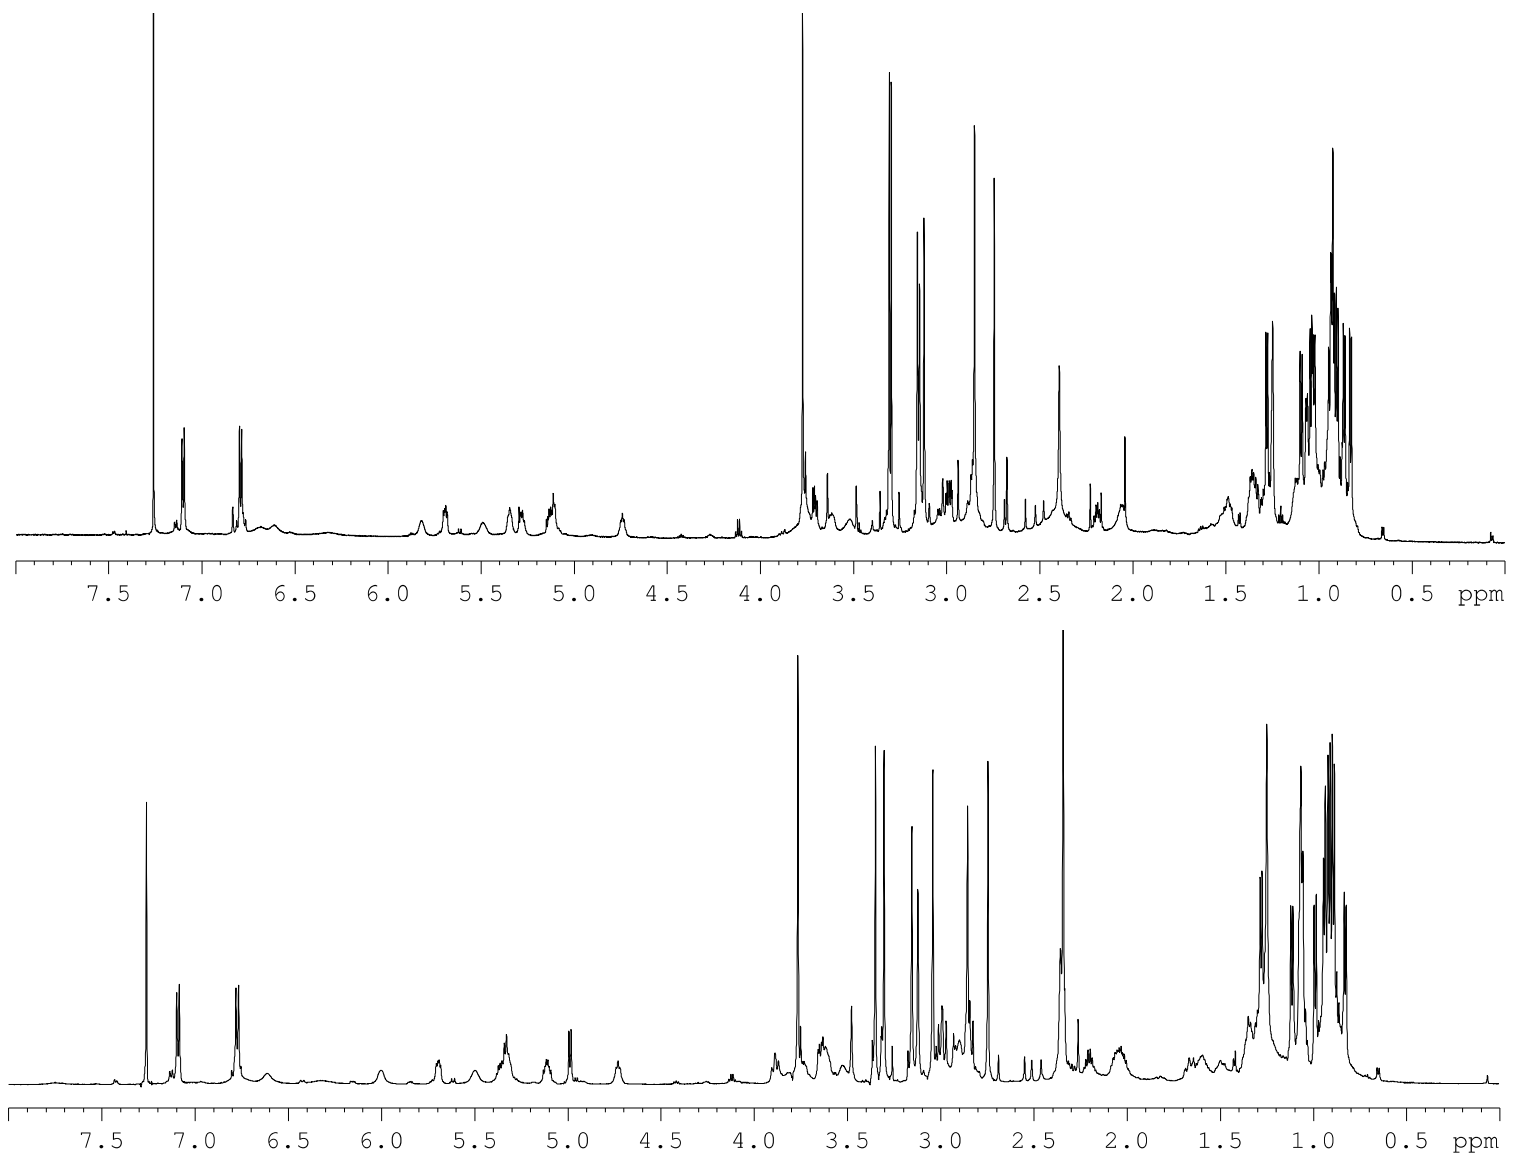

**Figure S1.** Comparative <sup>1</sup>H NMR spectra for [D-MeAla<sup>11</sup>]-coibamide A (upper) and natural coibamide A (lower)

DFILE 110225-MeSer(Me)-1H-int-2

COMNT

DATIM Fri Feb 25 14:54:46 2011

OBNUC 1H

EXMOD NON

OBFRO 399.65 MHz

OBSET 124.00 KHz

OBFIN 10500.00 Hz

POINT 32768

FREQU 7992.01 Hz

SCANS 8

ACQTM 4.1001 sec

PD 2.9000 sec

PW1 5.50 usec

IRNUC 1H

CTEMP 22.5 c

SLVNT CDCL3

EXREF 0.00 ppm

BF 0.12 Hz

RGAIN 17

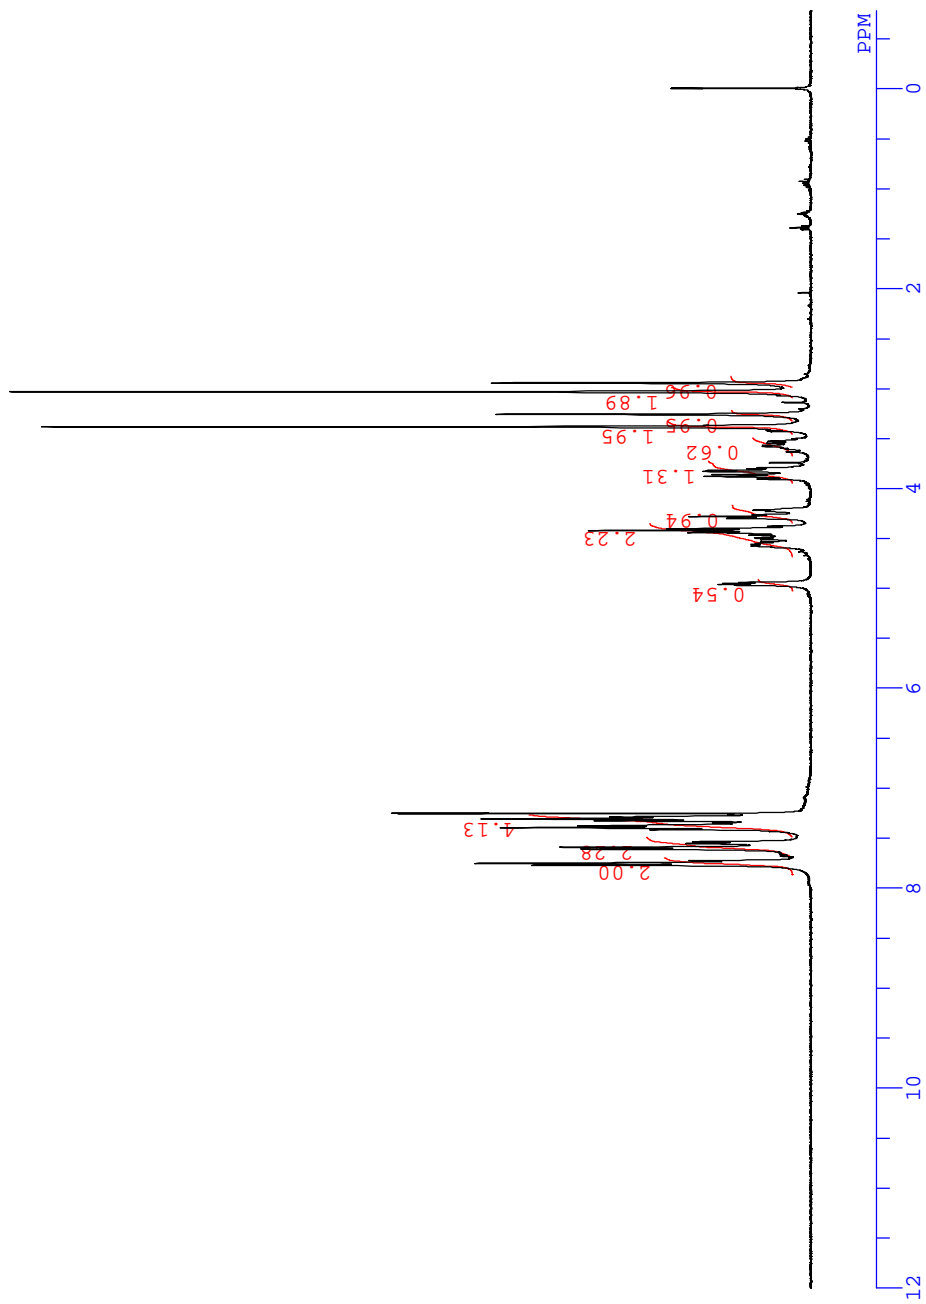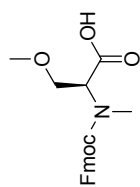

Fmoc-MeSer(Me)-OH

DFILE 110226-MeSer(Me)-C-1-int-  
COMNT single pulse decoupled ga  
DATIM 26-02-2011 10:09:58  
OBNUC 13C  
EXMOD single\_pulse\_dec  
OBFRQ 125.77 MHz  
OBSET 7.87 KHz  
OBFIN 4.21 Hz  
POINT 26214  
FREQU 31446.06 Hz  
SCANS 256  
ACQTM 0.8336 sec  
PD 2.0000 sec  
PWL 3.73 usec  
IRNUC 1H  
CTEMP 25.7 c  
SLVNT CDCL3  
EXREF 77.00 ppm  
BF 1.20 Hz  
RGAIN 50

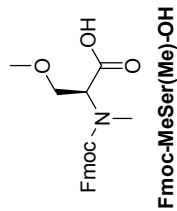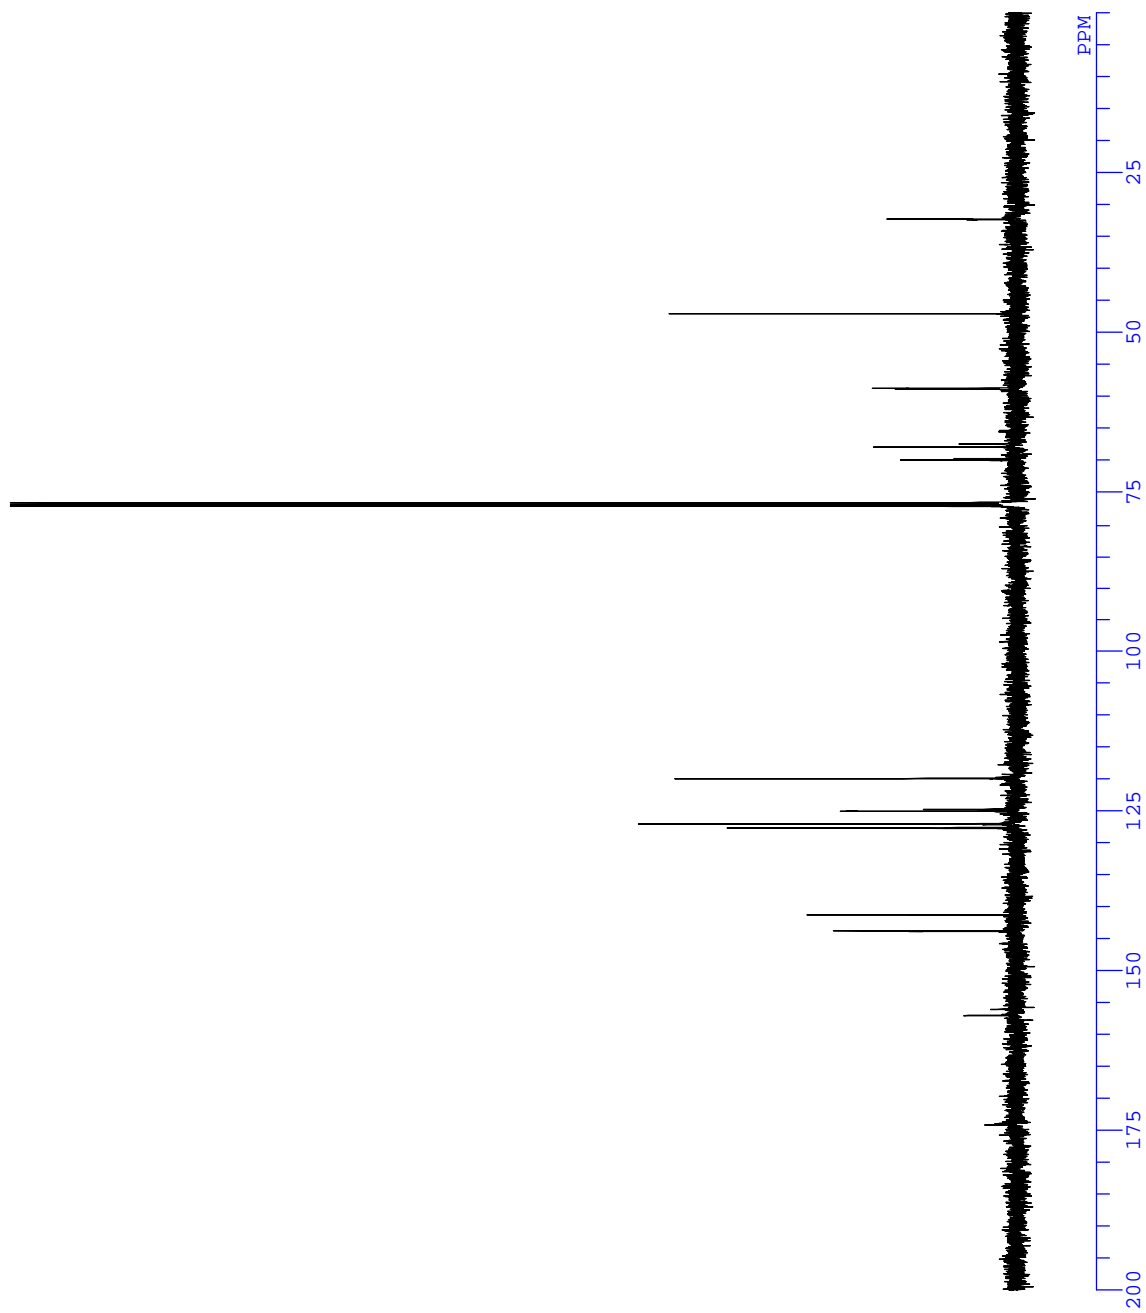

DFIL1E 140708-Hva-OBn-1H\_Proton-  
 COMNT single\_pulse  
 DATIM 2014-07-08 18:03:15  
 OBNUC 1H  
 EXMOD proton.jxp  
 OBFRO 399.78 MHz  
 OBSET 4.19 KHz  
 OBFIN 7.29 Hz  
 POINT 13107  
 FREQU 6002.40 Hz  
 SCANS 16  
 ACQTM 2.1837 sec  
 PD 5.0000 sec  
 PW1 3.06 usec  
 IRNUC 1H  
 CTEMP 22.0 c  
 SLVNT CDCL3  
 EXREF 0.00 ppm  
 BF 0.12 Hz  
 RGAIN 28

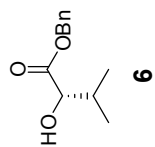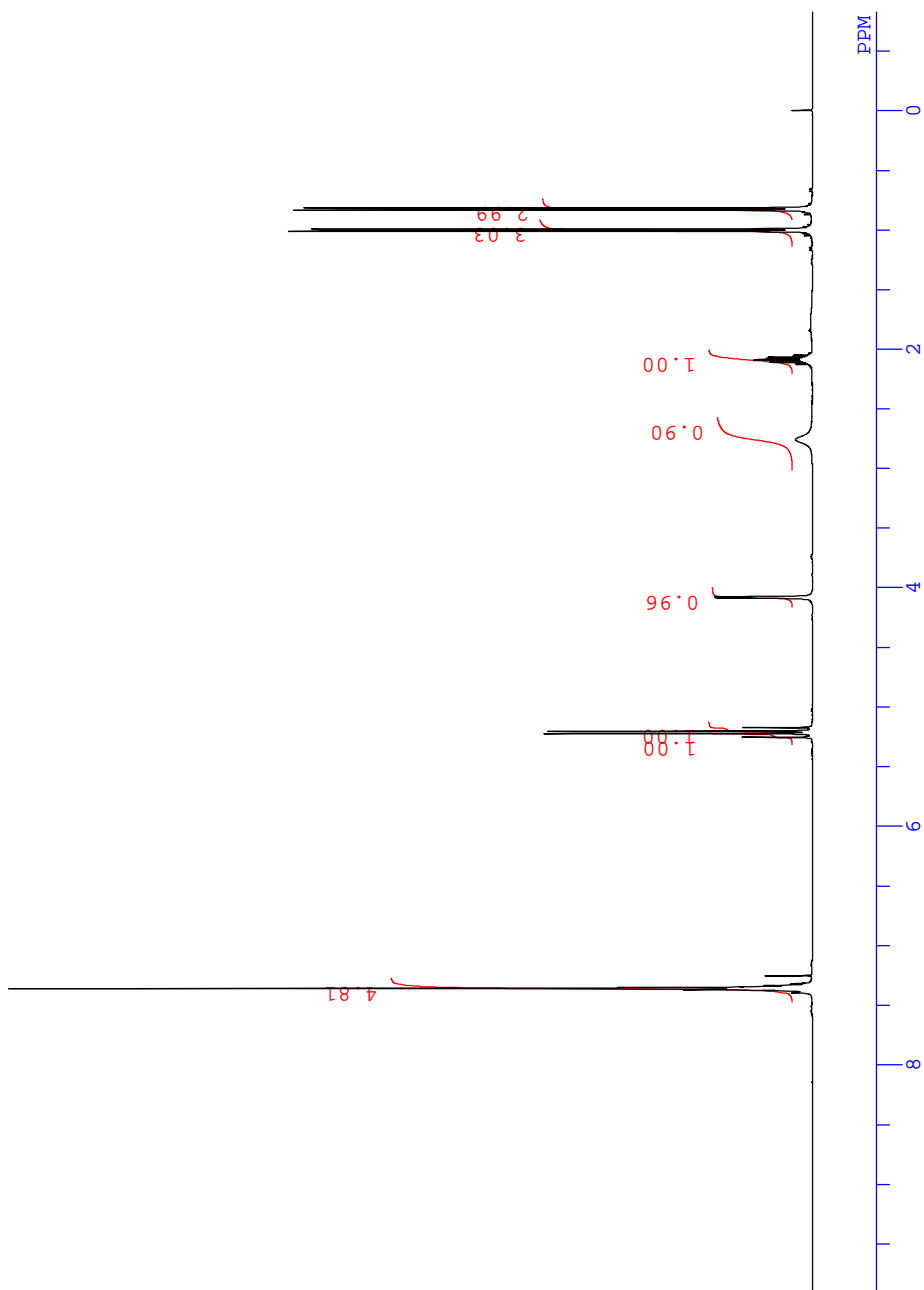

DFILE 140708-Hva-OBn-13C\_Carbon  
COMNT single pulse decoupled ga  
DATIM 2014-07-08 18:17:11  
OBNUC 13C

EXMOD carbon.jxp  
OBFRQ 100.53 MHz  
OBSET 5.35 KHz  
OBFIN 5.86 Hz  
POINT 26214  
FREQU 25125.63 Hz  
SCANS 200  
ACQTM 1.0433 sec  
PD 2.0000 sec  
PWL 3.77 usec  
IRNUC 1H  
CTEMP 22.0 c  
SLVNT CDCL3  
EXREF 77.00 ppm  
BF 1.20 Hz  
RGAIN 60

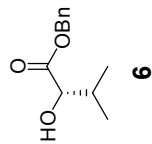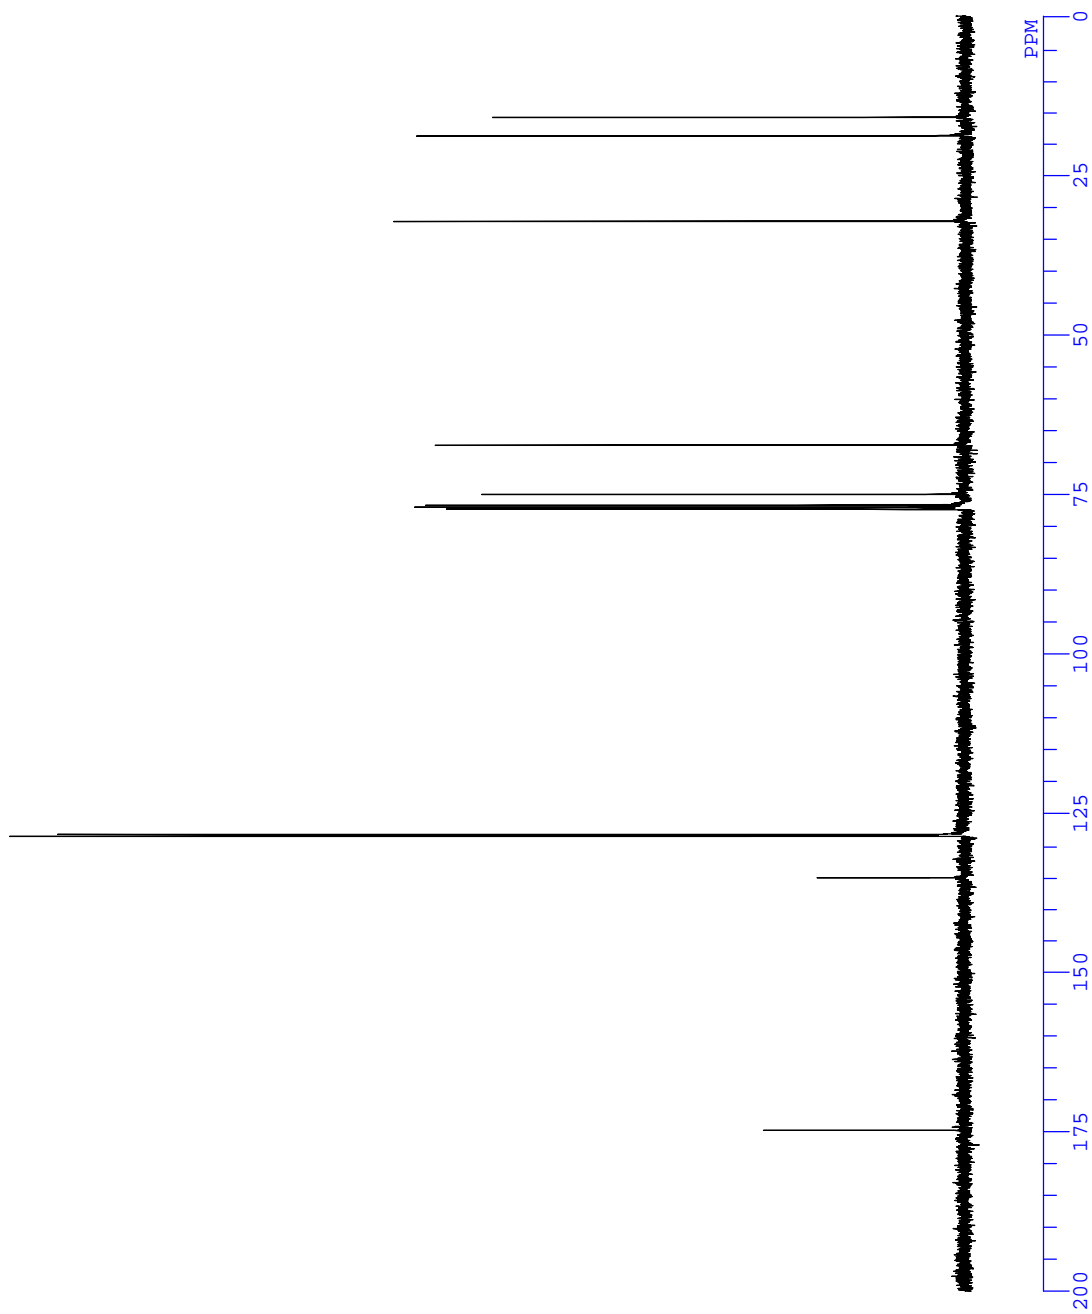

DFILE 141009-F183-Fmoc-Val-Hva-

COMNT single\_pulse

DATIM 2014-10-11 10:43:01

OBNUC 1H

EXMOD proton.jxp

OBFREQ 399.78 MHz

OBSET 4.19 KHz

OBFIN 7.29 Hz

POINT 13107

FREQ 6002.40 Hz

SCANS 8

ACQTM 2.1837 sec

PD 5.0000 sec

PW1 3.06 usec

IRNUC 1H

CTEMP 20.9 C

SLVNT CDCL3

EXREF 0.00 ppm

BF 0.12 Hz

RGAIN 30

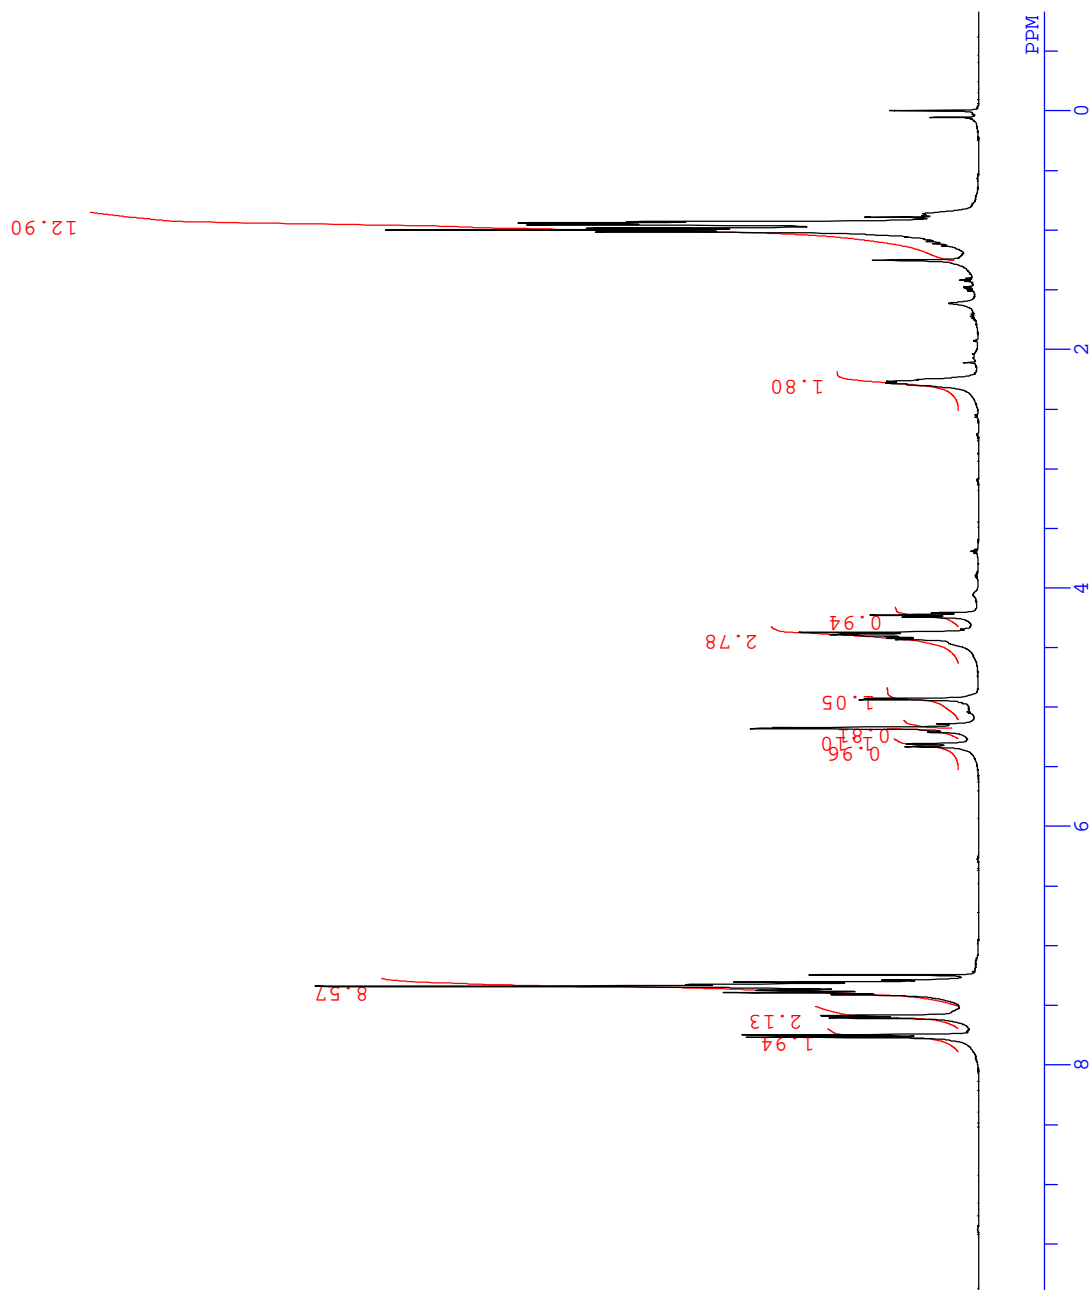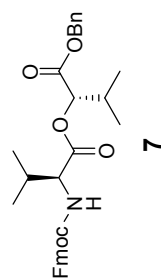

DFIL1E 140826-Fmoc-Val-Hva-OBn-1  
 COMNT single pulse decoupled ga  
 DATIM 2014-08-26 21:37:24  
 OBNUC 13C  
 EXMOD single\_pulse\_dec  
 OBFRO 125.77 MHz  
 OBSET 7.87 KHz  
 OBFIN 4.21 Hz  
 POINT 26214  
 FREQU 31446.06 Hz  
 SCANS 256  
 ACQTM 0.8336 sec  
 PD 2.0000 sec  
 PW1 3.50 usec  
 IRNUC 1H  
 CTEMP 23.6 c  
 SLVNT CDCL3  
 EXREF 77.00 ppm  
 BF 1.20 Hz  
 RGAIN 52

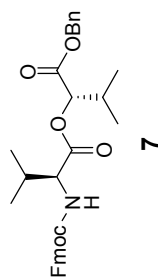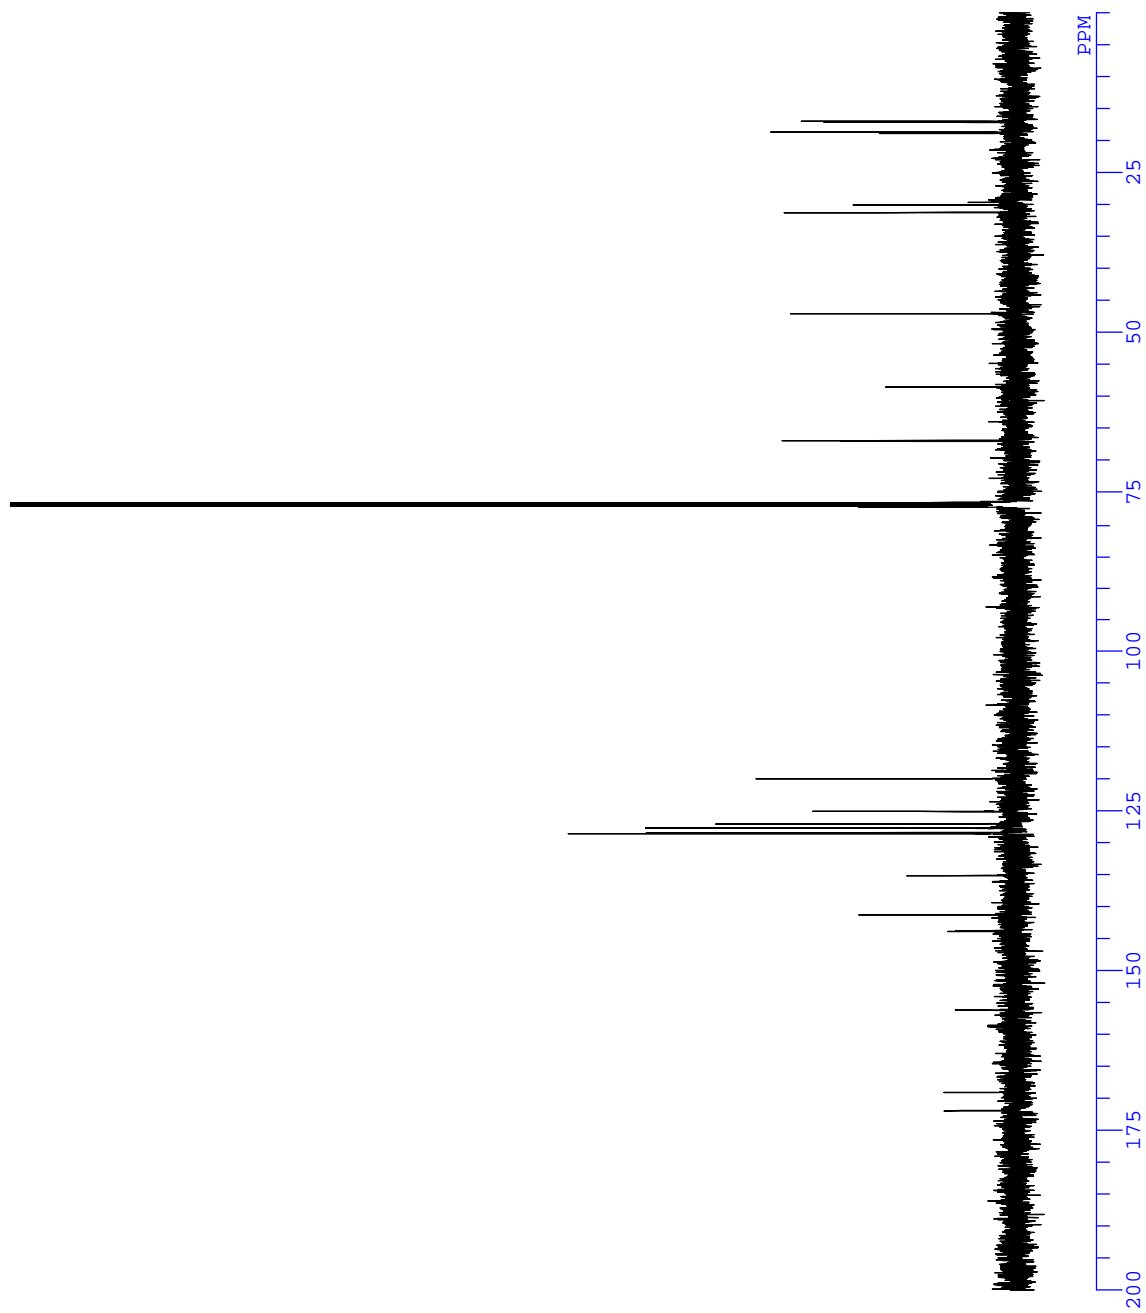



DFILE 140708-Fmoc-Val-Hva-OH-1H  
 COMNT single\_pulse  
 DATIM 2014-07-08 11:31:27  
 OBNUC 1H  
 EXMOD single\_pulse.ex2  
 OBFRQ 500.16 MHz  
 OBSET 2.41 KHz  
 OBFIN 6.01 Hz  
 POINT 13107  
 FREQU 7507.39 Hz  
 SCANS 8  
 ACQTM 1.7459 sec  
 PD 5.0000 sec  
 PW1 6.82 usec  
 IRNUC 1H  
 CTEMP 50.0 c  
 SLVNT CDCL3  
 EXREF 0.00 ppm  
 BF 0.12 Hz  
 RGAIN 36

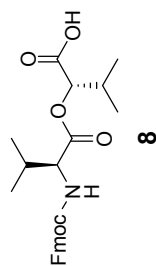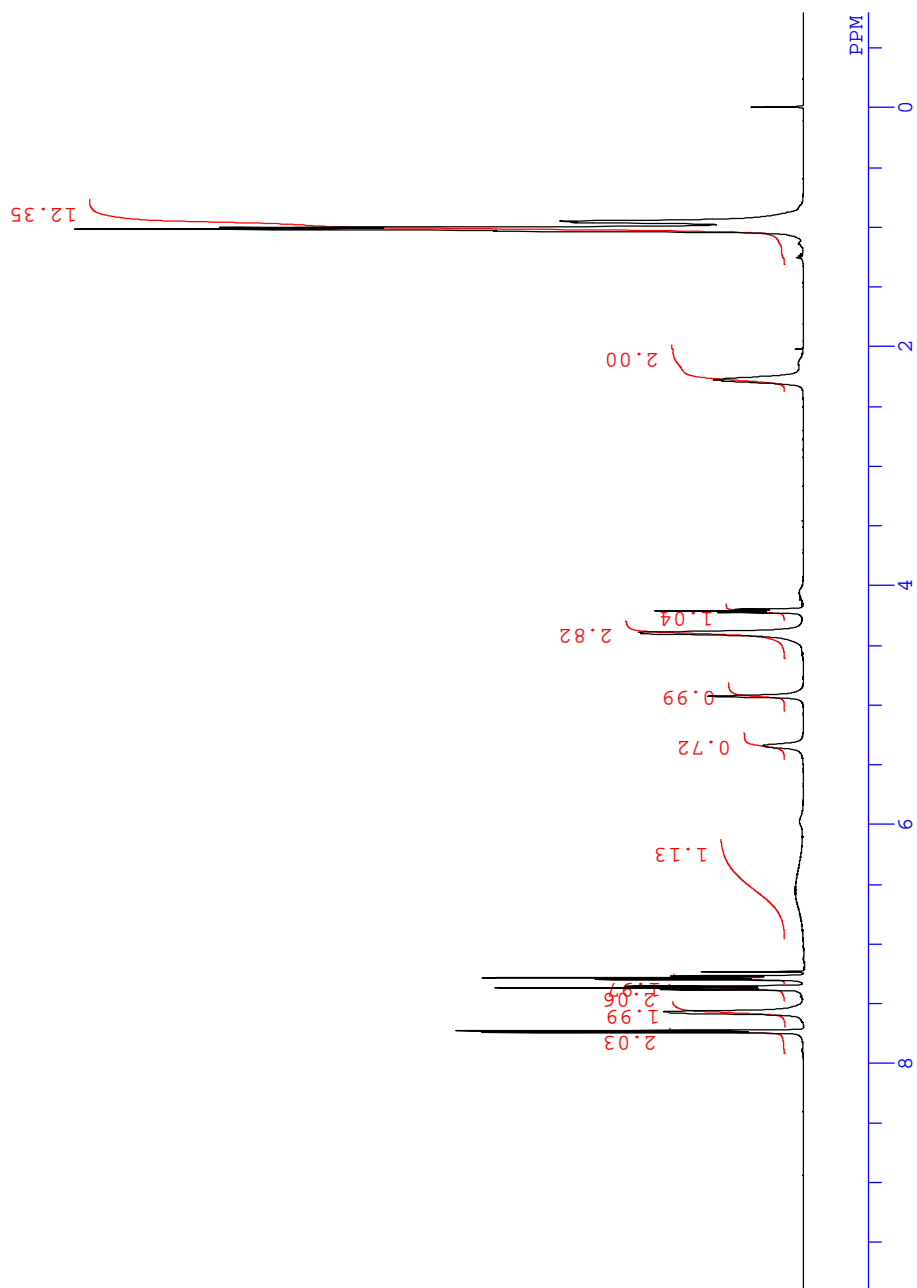

DFILE 140708-Fmoc-Val-Hva-OH-13  
COMNT single\_pulse\_decoupled ga  
DATIM 2014-07-08 13:58:57  
OBNUC 13C

EXMOD single\_pulse\_dec  
OBFRQ 125.77 MHz  
OBSET 7.87 KHz  
OBFIN 4.21 Hz  
POINT 26214  
FREQU 31446.06 Hz  
SCANS 256  
ACQTM 0.8336 sec  
PD 2.0000 sec  
PWI 3.50 usec  
IRNUC 1H  
CTEMP 50.0 c  
SLVNT CDCL3  
EXREF 77.00 ppm  
BF 1.20 Hz  
RGAIN 52

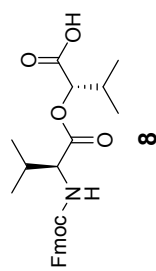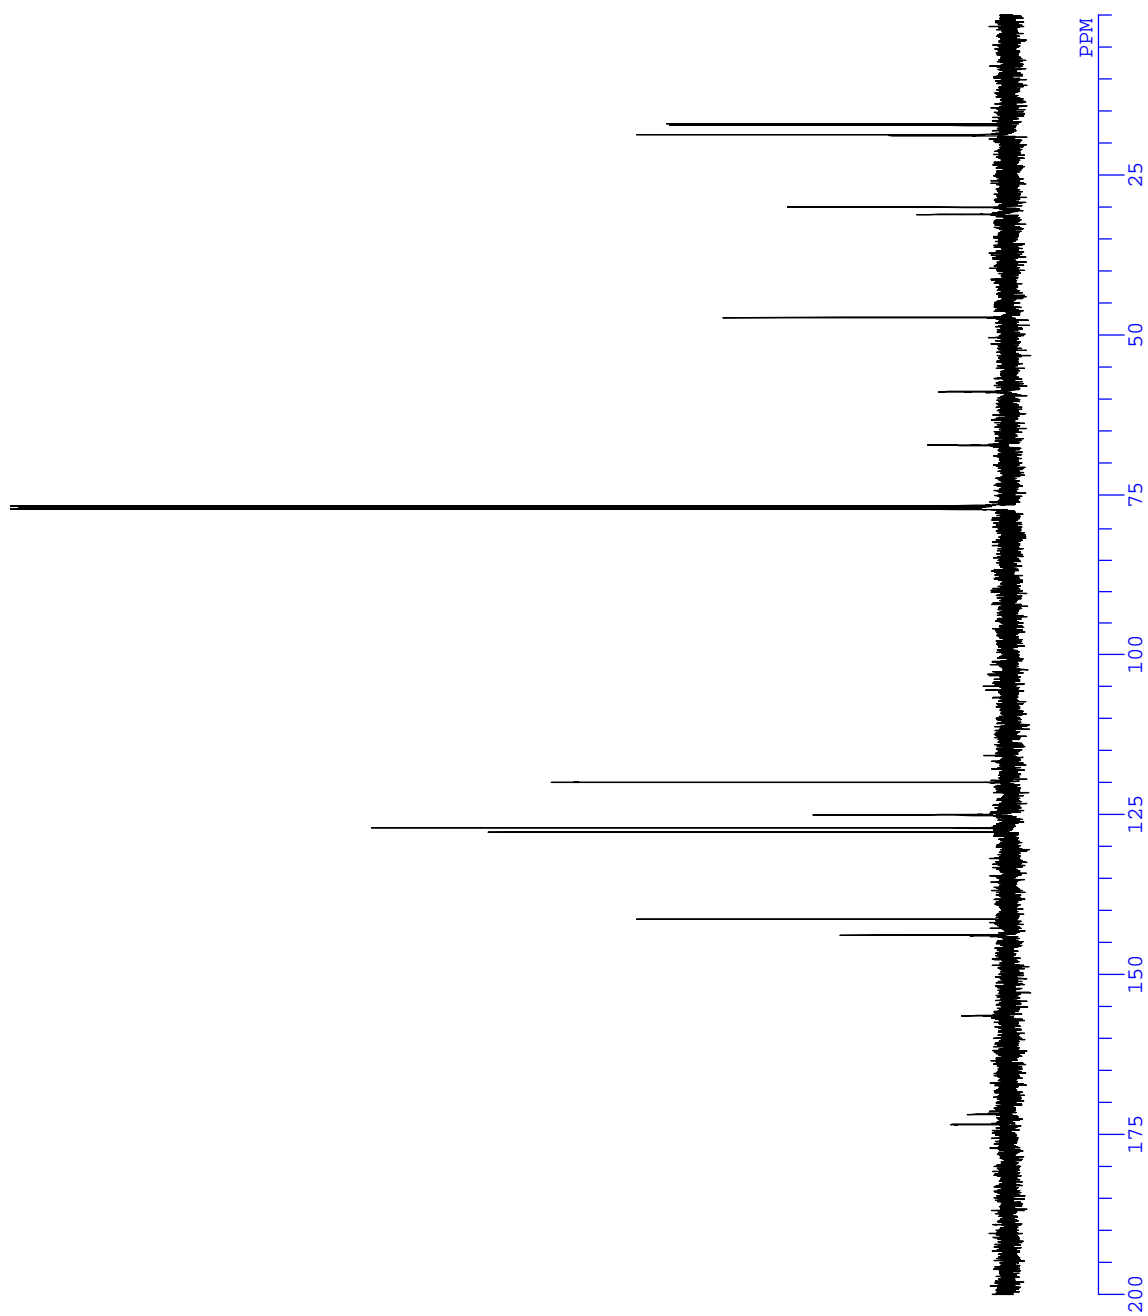

DFILE 110702-13C-Thrbody-overwe  
 COMNT single pulse decoupled ga  
 DATIM 04-07-2011 02:32:32  
 OBNUC 13C  
 EXMOD single\_pulse\_dec  
 OBFRO 125.77 MHz  
 OBSET 7.87 KHz  
 OBFIN 4.21 Hz  
 POINT 26214  
 FREQU 31446.06 Hz  
 SCANS 32768  
 ACQTM 0.8336 sec  
 PD 2.0000 sec  
 PW1 3.73 usec  
 IRNUC 1H  
 CTEMP 28.6 c  
 SLVNT CDCL3  
 EXREF 0.00 ppm  
 BF 1.20 Hz  
 RGAIN 56

S19

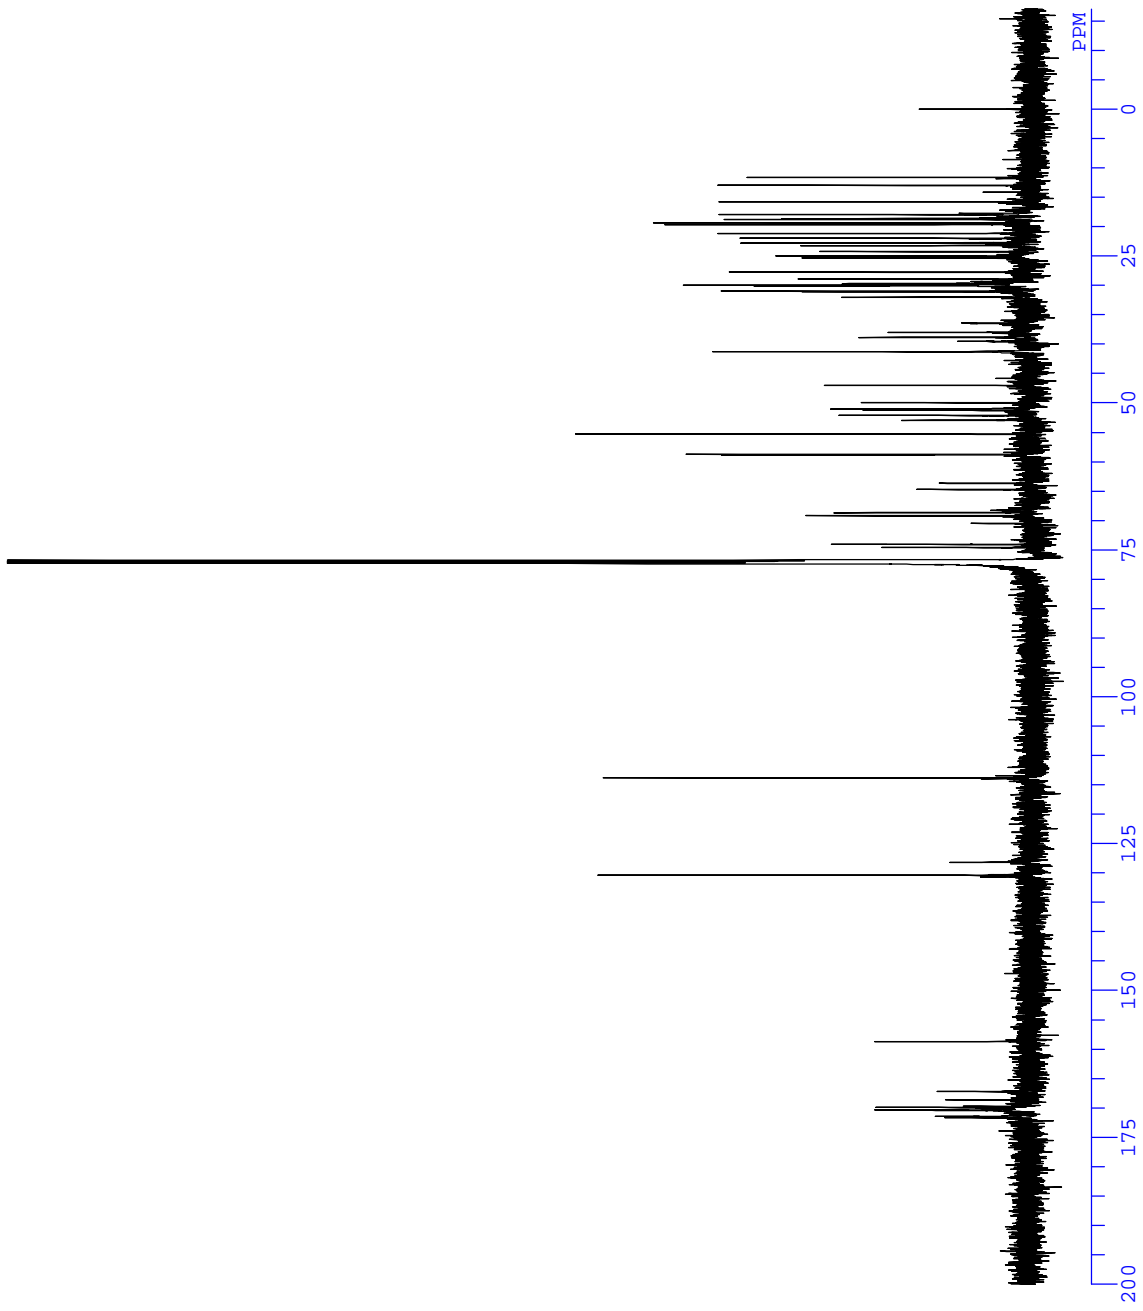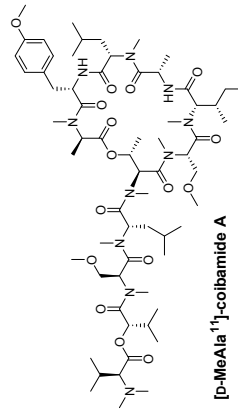

Supplement: NIHMS644396-supplement.pdf [file NIHMS644396-supplement.pdf]
